# Supplementary material for: Alterations in Glomerular Filtration Rates Using Different Algorithms in the Korean Population Visiting Local Clinics and Hospitals
Source: MDPI journal article supplement (doi:10.3390/jcm11185339), 2022-09-11
Supplement: s1 [file s1]

# Change in the Prevalence of Chronic Kidney Disease by Different Equations for Estimated Glomerular Filtration Rates in the Korean Population Visiting Local Clinics and Hospitals

**Supplementary Table S1.** Equations for estimated glomerular filtration rate (eGFR)

| Abbreviation | Equation                                                                                                                                                                                                                                                                                                                                                                                                               | Reference |
|--------------|------------------------------------------------------------------------------------------------------------------------------------------------------------------------------------------------------------------------------------------------------------------------------------------------------------------------------------------------------------------------------------------------------------------------|-----------|
| MDRD 2006    | $\text{eGFR (mL/min/1.73 m}^2\text{)} = 175 \times (\text{Scr})^{-1.154} \times (\text{Age})^{-0.203} \times (0.742 \text{ if female}) \times (1.212 \text{ if African American})$                                                                                                                                                                                                                                     | [1]       |
| CKD-EPI 2009 | $\text{eGFR (mL/min/1.73 m}^2\text{)} = 141 \times \min(\text{Scr}/k, 1)^\alpha \times \max(\text{Scr}/k, 1)^{-1.209} \times 0.993^{\text{Age}} \times (1.018 \text{ if female}) \times (1.159 \text{ if African American}),$ where k is 0.7 for females and 0.9 for males, $\alpha$ is -0.329 for females and -0.411 for males, min indicates the minimum of Scr/k or 1, and max indicates the maximum of Scr/k or 1. | [2]       |
| CKD-EPI 2021 | $\text{eGFR (mL/min/1.73 m}^2\text{)} = 142 \times \min(\text{Scr}/k, 1)^\alpha \times \max(\text{Scr}/k, 1)^{-1.200} \times 0.9938^{\text{Age}} \times (1.012 \text{ if female}),$ where k is 0.7 for females and 0.9 for males, $\alpha$ is -0.241 for females and -0.302 for males, min indicates the minimum of Scr/k or 1, and max indicates the maximum of Scr/k or 1.                                           | [3]       |

Abbreviations: MDRD, Modification of Diet in Renal Disease study equation; CKD-EPI, Chronic Kidney Disease Epidemiology Collaboration study equation; Scr, serum creatinine in mg/dL that assayed using methods traceable to isotope dilution mass spectrometry assigned and certified by the National Institute of Standards and Technology reference materials.

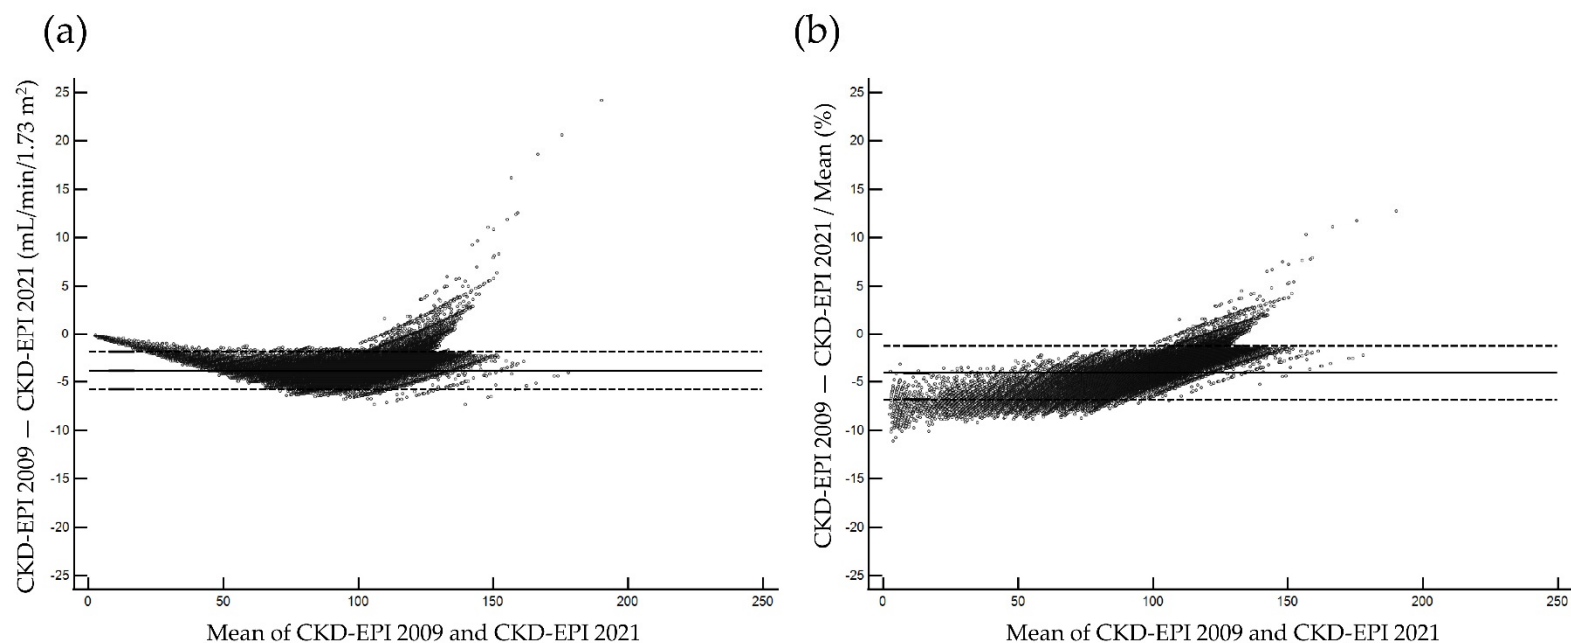

**Figure S1.** Comparison of eGFR values between CKD-EPI 2009 and CKD-EPI 2021 equations. (a) Difference and (b) % difference in eGFR values between CKD-EPI 2009 and CKD-EPI 2021 equations. Horizontal lines represent mean difference and mean % difference, and dashed lines represent 95% confidence interval of mean difference and mean % difference.

## References

1. Levey, A.S.; Coresh, J.; Greene, T.; Stevens, L.A.; Zhang, Y.L.; Hendriksen, S.; Kusek, J.W.; Van Lente, F. Using standardized serum creatinine values in the modification of diet in renal disease study equation for estimating glomerular filtration rate. *Ann Intern Med* **2006**, *145*, 247-254.
2. Levey, A.S.; Stevens, L.A.; Schmid, C.H.; Zhang, Y.L.; Castro, A.F., 3rd; Feldman, H.I.; Kusek, J.W.; Eggers, P.; Van Lente, F.; Greene, T., et al. A new equation to estimate glomerular filtration rate. *Ann Intern Med* **2009**, *150*, 604-612.
3. Inker, L.A.; Eneanya, N.D.; Coresh, J.; Tighiouart, H.; Wang, D.; Sang, Y.; Crews, D.C.; Doria, A.; Estrella, M.M.; Froissart, M., et al. New Creatinine- and Cystatin C-Based Equations to Estimate GFR without Race. *N Engl J Med* **2021**, *385*, 1737-1749.
